# Supplementary material for: Novel Hantavirus in Wildlife, United Kingdom
Source: PubMed Central journal article supplement (PMC3647411; doi:10.3201/eid1904.121057), 2013-04
Supplement: 12-1057-Techapp-s1.pdf [file 12-1057-Techapp-s1.pdf]

# Novel Hantavirus in Wildlife, United Kingdom

## Technical Appendix

Table. Similarity (% identity) of B41 partial S and L segment sequences with those of other hantaviruses\*†‡

| Hantavirus | S segment |      | L segment |      |
|------------|-----------|------|-----------|------|
|            | nt        | aa   | nt        | aa   |
| TOPV       | 78.8      | 86.3 | n/a       | n/a  |
| Fusong     | 75.0      | 80.9 | 77.2      | 80.0 |
| KHAV       | 74.7      | 85.5 | n/a       | n/a  |
| PUUV       | 73.7      | 80.2 | 76.6      | 84.8 |
| HOKV       | 73.5      | 79.4 | 76.9      | 84.8 |
| PHV        | 68.7      | 73.3 | 77.5      | 88.0 |
| TULV       | 65.7      | 66.4 | 77.5      | 86.4 |
| SNV        | 58.1      | 53.4 | 71.9      | 78.4 |
| SWSV       | 56.3      | 48.1 | 68.0      | 70.4 |
| ANDV       | 55.8      | 51.9 | 72.2      | 81.6 |
| DOBV       | 52.8      | 42.7 | 63.3      | 66.4 |
| SEOV       | 52.8      | 42.3 | 63.6      | 68.8 |
| SAAV       | 51.8      | 43.5 | 63.9      | 65.6 |
| HTNV       | 51.5      | 41.2 | 66.9      | 69.6 |
| TPMV       | 49.2      | 41.2 | 63.9      | 63.2 |
| MGB/1209   | n/a       | n/a  | 65.0      | 62.4 |

\*S, small; L, large; TOPV, Topografov virus (AJ011646); Fusong (EU072481 and FJ170807); KHAV, Khabarovsk (U35255); PUUV, Puumala virus (M32750 and M63194); HOKV, Hokkaido virus (AB675463 and AB675455); PHV, Prospect Hill virus (M34011 and EF646763); TULV, Tula virus (NC005227 and NC005226); SNV, Sin Nombre virus (NC005216 and L37901); SWSV, Seewis virus (GQ293136 and EF636026); ANDV, Andes virus (AF291702 and AF291704); DOBV, Dobrava-Belgrade (AY961615 and GU904039); SEOV, Seoul virus (AY273791 and X56492); SAAV, Saaremaa virus (AJ616854 and AJ410618); HTNV, Hantaan virus (NC005218 and NC005222); TPMV, Thottapalayam virus (AY526097 and NC010707); MGB/1209, Magboi/1209 virus (JN037851); n/a, sequence not available.

†396 nucleotides (nt) of the S segment (positions 620-1015), and 371 nt of the L segment (positions 2962-3332) and the deduced amino acid (aa) sequences (131 aa, position 194-324 of the nucleocapsid protein; 123 aa, position 976-1098 of the viral RNA-dependent RNA polymerase) have been compared using MegAlign (Lasergene DNASTar). Fragment positions were defined according to complete sequences of PUUV strain CG1820.

‡ Partial L sequences obtained following Klempa et al 2006 (5). Partial S sequences obtained using the following primers in the reverse transcription and the first round of PCR: forward (SF490) AARGANAAYAARGGNACN and reverse (SR1157) YTGDATAHCCCATNGAYTG. Nested PCR followed with primers: forward (SF604) ATGAARGCNGADGARHTNACN, and reverse (SR1061) CATDATNGTRTTHCTCATRTC.

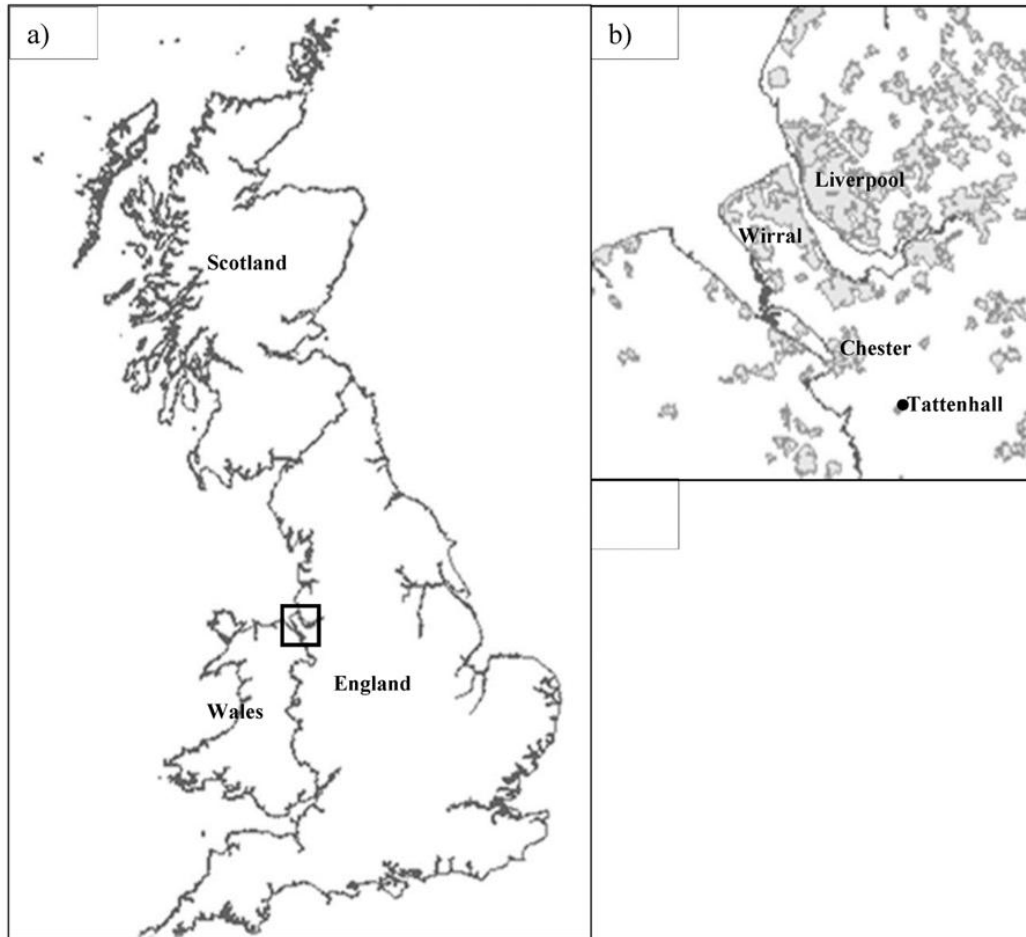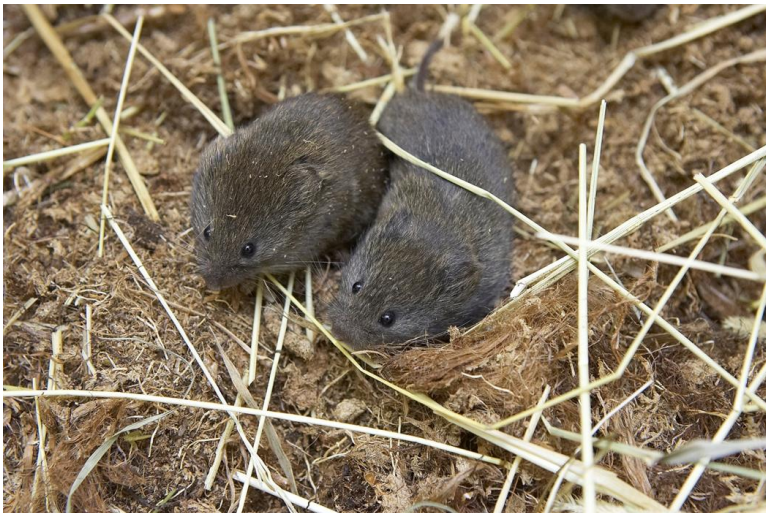

Figure. Location of wild field vole (B41) trapped in August 2011 within United Kingdom (A) and northwestern England (B) (urban areas shown in gray). Image shows field voles (*Microtus agrestis*); image courtesy of E. Oksanen.
